# Supplementary material for: Proteasome-Mediated Processing of Def1, a Critical Step in the Cellular Response to Transcription Stress
Source: PubMed Central journal article supplement — Cell. 2013 Aug 29;154(5):983–95. doi: 10.1016/j.cell.2013.07.028 (PMC3778974; doi:10.1016/j.cell.2013.07.028), 2013-08-29
Supplement: mmc1.pdf [file mmc1.pdf]

Table S1. Strains Used in This Study, Related to Experimental Procedures

| Strain number | Strain name                         | Genotype                                                                                                                                        | Source                  |
|---------------|-------------------------------------|-------------------------------------------------------------------------------------------------------------------------------------------------|-------------------------|
|               | <i>W303-1a</i>                      | <i>MATa ura3 leu2-3, 112 his3-11,15 trp1-1 ade2-1 can1-100</i>                                                                                  | R. Rothstein            |
|               | <i>W303 diploid</i>                 | <i>MATa/MATalpha ura3 leu2-3, 112 his3-11,15 trp1-1 ade2-1 can1-100</i>                                                                         | R. Rothstein            |
| RJD1144       | <i>Pre1-Flag-His</i>                | <i>MATa his3Δ200 leu2-3,112 lys2-801 trp1Δ63 ura3-52 PRE1<sup>FH</sup>::Yiplac211 (URA3)</i>                                                    | (Verma et al., 2000)    |
| JSY1175       | <i>Ubp2-His-TEV-9xMyc</i>           | <i>W303 MATa ura3 leu2-3, 112 his3-11,15 trp1-1 ade2-1 can1-100, Ubp2-6xHis-2xTEV-9xMyc::TRP, FLAG-Rsp5 ::URA</i>                               | This study              |
| JSY568        | <i>Δdef1 ::URA3</i>                 | <i>W303 MATa leu2-3,112 his3-11,15 trp1-1 ade2-1 can1-100 Δdef1::URA3</i>                                                                       | (Woudstra et al., 2002) |
| JSY645        | <i>Δdef1::TRP1</i>                  | <i>W303 MATa ura3 leu2-3,112 his3-11,15 ade2-1 can1-100 Δdef1::TRP1</i>                                                                         | (Woudstra et al., 2002) |
| JSY1176       | <i>def1 1-100 HA</i>                | <i>W303 MATa ura3 leu2-3,112 his3-11,15 ade2-1 can1-100, def1<sub>1-100</sub>-3HA::HIS3</i>                                                     | This study              |
| JSY1177       | <i>def1 1-200 HA</i>                | <i>W303 MATa ura3 leu2-3,112 his3-11,15 ade2-1 can1-100, def1<sub>1-200</sub>-3HA::HIS3</i>                                                     | This study              |
| JSY1178       | <i>def1 1-300 HA</i>                | <i>W303 MATa ura3 leu2-3,112 his3-11,15 ade2-1 can1-100, def1<sub>1-300</sub>-3HA::HIS3</i>                                                     | This study              |
| JSY1179       | <i>def1 1-600 HA</i>                | <i>W303 MATa ura3 leu2-3,112 his3-11,15 ade2-1 can1-100, def1<sub>1-600</sub>-3HA::HIS3</i>                                                     | This study              |
| JSY1180       | <i>def1 1-700 HA</i>                | <i>W303 MATa ura3 leu2-3,112 his3-11,15 ade2-1 can1-100, def1<sub>1-700</sub>-3HA::HIS3</i>                                                     | This study              |
| JSY1181       | <i>def1 1-738 HA</i>                | <i>W303 MATa ura3 leu2-3,112 his3-11,15 ade2-1 can1-100, DEF1-3HA::HIS</i>                                                                      | This study              |
| JSY1182       | <i>DEF1/def1<sub>1-500</sub>-HA</i> | <i>MATa/MATalpha ura3 leu2-3, 112 his3-11,15 trp1-1 ade2-1 can1-100, DEF1/def1<sub>1-500</sub>-3HA::HIS3</i>                                    | This study              |
| JSY1183       | <i>def1 1-530 HA</i>                | <i>W303 MATa ura3 leu2-3,112 his3-11,15 ade2-1 can1-100, def1<sub>1-530</sub>-3HA::HIS3</i>                                                     | This study              |
| JSY1184       | <i>def1 1-540 HA</i>                | <i>W303 MATa ura3 leu2-3,112 his3-11,15 ade2-1 can1-100, def1<sub>1-540</sub>-3HA::HIS3</i>                                                     | This study              |
| JSY1185       | <i>def1 1-550 HA</i>                | <i>W303 MATa ura3 leu2-3,112 his3-11,15 ade2-1 can1-100, def1<sub>1-550</sub>-3HA::HIS3</i>                                                     | This study              |
| JSY1186       | <i>def1 1-560 HA</i>                | <i>W303 MATa ura3 leu2-3,112 his3-11,15 ade2-1 can1-100, def1<sub>1-560</sub>-3HA::HIS3</i>                                                     | This study              |
| JSY1187       | <i>def1 1-570 HA</i>                | <i>W303 MATa ura3 leu2-3,112 his3-11,15 ade2-1 can1-100, def1<sub>1-570</sub>-3HA::HIS3</i>                                                     | This study              |
| JSY1188       | <i>def1 1-580 HA</i>                | <i>W303 MATa ura3 leu2-3,112 his3-11,15 ade2-1 can1-100, def1<sub>1-580</sub>-3HA::HIS3</i>                                                     | This study              |
| JSY1189       | <i>def1 1-590 HA</i>                | <i>W303 MATa ura3 leu2-3,112 his3-11,15 ade2-1 can1-100, def1<sub>1-590</sub>-3HA::HIS3</i>                                                     | This study              |
| JSY1190       | <i>Def1 WT</i>                      | As JSY 568, but with <i>DEF1</i> knock-in (KI) at genomic <i>DEF1</i> locus                                                                     | This study              |
| JSY1191       | <i>Def1-TEV</i>                     | As JSY568, but with <i>def1-TEV522</i> KI at genomic <i>DEF1</i> locus                                                                          | This study              |
| JSY1192       | <i>rsp5-1</i>                       | <i>W303 MATa ura3 leu2-3,112 his3-11,15 ade2-1 can1-100 rsp5 I733S::pRS303</i>                                                                  | (Harreman et al., 2009) |
| GAC202        | GAC202                              | <i>Mata his3-11 leu2-3,112 ura3-52 lys2-801 trp1-1 pdr5Δ::KanMX6 pre3-Δ2::HIS3 pup1Δ::leu2-HIS3 [pRS317-pup1-T30A] [YCplac22-pre3-T20A] gal</i> | (Collins et al., 2010)  |
| GAC201        | GAC201                              | <i>Mata his3-11 leu2-3,112 ura3-52 lys2-801 trp1-1 pdr5Δ::KanMX6 pre3-Δ2::HIS3 pup1Δ::leu2-HIS3 [pRS317-PUP1] [YCplac22-PRE3] gal</i>           | (Collins et al., 2010)  |
| JSY1193       | <i>4xUbm</i>                        | As JSY568, but with <i>def1 K281R, K288R, K328R, K329R</i> at genomic <i>DEF1</i> locus                                                         | This study              |
| JSY1194       | <i>eGFP-DEF1</i>                    | As JSY568, but with <i>eGFP-DEF1</i> at genomic <i>DEF1</i> locus                                                                               | This study              |
| JSY1195       | <i>eGFP-DEF1 GAC202</i>             | <i>Mata his3-11 leu2-3,112 ura3-52 lys2-801 trp1-1, but with eGFP-DEF1</i> at genomic <i>DEF1</i> locus                                         | This study              |
|               | <i>DEF1-GFP</i>                     | <i>MATa his3Δ1 leu2Δ0 met15Δ0 ura3Δ0, DEF1-GFP::HIS3</i>                                                                                        | (Huh et al., 2003)      |

|          |                                                 |                                                                                                                               |                             |
|----------|-------------------------------------------------|-------------------------------------------------------------------------------------------------------------------------------|-----------------------------|
| JSY1196  | <i>def1<sup>CUEm</sup></i>                      | As JSY568, but with <i>def1 I54A, I55A, F33A, P34A</i> at genomic <i>DEF1</i> locus                                           | This study                  |
| JSY1197  | <i>eGFP-def1<sup>CUEm</sup></i>                 | As JSY568, but with <i>eGFP-def1 I54A, I55A, F33A, P34A</i> at genomic <i>DEF1</i> locus                                      | This study                  |
| JSY1198  | <i>9xMyc-TEV-His-DEF1</i>                       | As JSY568, but with <i>9xMyc-2xTEV-6xHis-DEF1</i> at genomic <i>DEF1</i> locus                                                | This study                  |
| JSY1199  | <i>9xMyc-TEV-His-def1<sup>CUEm</sup></i>        | As JSY568, but with <i>9xMyc-2xTEV-6xHis -def1 I54A, I55A, F33A, P34A</i> at genomic <i>DEF1</i> locus                        | This study                  |
| JSY642   | <i>DEF1-6xHA</i>                                | <i>W303 MATa ura3 leu2-3,112 his3-11,15 ade2-1 can1-100 def1::pHAHIS304</i>                                                   | (Reid and Svejstrup, 2004)  |
| JSY919   | <i>RPB1-3xHA</i>                                | <i>MATa ura3-52, trp1-1, prb1-1122, prc1-407, pep4-3, leu2-3, 112 nuc1::LEU2 RPB1-3HA::URA</i>                                | (Reid and Svejstrup, 2004)  |
| RAT7-1   | <i>rat7-1</i>                                   | <i>MATa ura3-52, leu2Δ1, hisΔ200, rat7-1.</i>                                                                                 | (Gorsch et al., 1995)       |
| MNY8     | <i>Mny8</i>                                     | <i>MATa leu2, his3, trp1, ura3. pDC-CRM1T539C::LEU2</i>                                                                       | (Neville and Rosbash, 1999) |
| JSY1201  | <i>Mny8 GFP-Def1</i>                            | <i>Mata leu2, his3, trp1, ura3. pDC-CRM1T539C::LEU2. GFP-Def1::URA</i>                                                        | This study                  |
| JSY1202  | <i>Def1<sup>CUEm</sup>, 9xMyc-TEV-His-Elc1</i>  | As JSY1196 with <i>9xMyc-2xTEV-6xHis</i> at N-terminus of <i>Elc1::URA</i> (see JSY 1116)                                     | This study                  |
| JSY 1116 | <i>9xMyc-TEV-His -Elc1</i>                      | <i>MATa ura3 leu2-3, 112 his3-11,15 trp1-1 ade2-1 can1-100. 9xMyc-2xTEV-6xHis at N-terminus of Elc1::URA</i>                  | Harreman et al, 2009        |
| JSY 1205 | <i>Δela1</i>                                    | <i>MATa ura3 leu2-3, 112 his3-11,15 trp1-1 ade2-1 can1-100. Δela1::URA3</i>                                                   | (Hobson et al., 2012)       |
| JSY 1203 | <i>Ela1<sup>1-250</sup></i>                     | <i>MATa ura3 leu2-3, 112 his3-11,15 trp1-1 ade2-1 can1-100, Ela1 1-250::HIS</i>                                               | This study                  |
| JSY 1204 | <i>Ela1 WT</i>                                  | <i>MATa ura3 leu2-3, 112 his3-11,15 trp1-1 ade2-1 can1-100, Ela1::HIS</i>                                                     | This study                  |
| JSY 1208 | <i>Def1Δ400-445</i>                             | As JSY568, but with <i>def1</i> lacking residues 400-445                                                                      | This study                  |
| JSY 1209 | <i>Def1Δ430-490</i>                             | As JSY568, but with <i>def1</i> lacking residues 430-490                                                                      | This study                  |
| JSY 1210 | <i>Def1Δ480-520</i>                             | As JSY568, but with <i>def1</i> lacking residues 480-520                                                                      | This study                  |
| JSY 1211 | <i>Def1Δ506-575</i>                             | As JSY568, but with <i>def1</i> lacking residues 506-575                                                                      | This study                  |
| JSY1215  | <i>9xMyc-TEV-His-Elc1, Ela1 WT</i>              | <i>MATa ura3 leu2-3, 112 his3-11,15 trp1-1 ade2-1 can1-100, 9xMyc-2xTEV-6xHis at N-terminus of Elc1::URA, Ela1::HIS</i>       | This study                  |
| JSY1216  | <i>9xMyc-TEV-His-Elc1, Ela1<sup>1-250</sup></i> | <i>MATa ura3 leu2-3, 112 his3-11,15 trp1-1 ade2-1 can1-100, 9xMyc-2xTEV-6xHis at N-terminus of Elc1::URA, Ela1 1-250::HIS</i> | This study                  |

Table S2. Plasmids Used in This Study, Related to Experimental Procedures

| Name                                  | Description                                                                                                                                              | Source                      |
|---------------------------------------|----------------------------------------------------------------------------------------------------------------------------------------------------------|-----------------------------|
| pRS423                                | AmpR, 2 $\mu$ , URA3                                                                                                                                     | (Sikorski and Hieter, 1989) |
| pRS414-DEF1                           | AmpR, CEN, TRP; DEF1 expressed from own promoter and terminator                                                                                          | This study                  |
| pRS414-MTH-DEF1                       | AmpR, CEN, TRP; as above, but 9xMyc-2xTEV-6xHis-DEF1                                                                                                     | This study                  |
| pRS414-MTH-DEF1-TEV                   | AmpR, CEN, TRP; as above, but TEV site inserted at DEF1 amino acids 522-523 (note: N-terminal TEV sites were removed during JSY1191 strain construction) | This study                  |
| pRS414-def1 <sup>CUEm</sup>           | AmpR, CEN, TRP; as pRS414-DEF1, but CUE domain mutated (I54A, I55A, F33A, P34A)                                                                          | This study                  |
| pRS414-def1 <sup>Ubm</sup>            | AmpR, CEN, TRP; as pRS414-DEF1, but Def1 mutated at K281R, K288R, K328R, K329R                                                                           | This study                  |
| YIPlac204-TEV118                      | AmpR, TRP; pGAL10, NLS-9xMyc-TEV-2xNLS                                                                                                                   | (Uhlmann et al., 2000)      |
| pRS425-Myc-TEV                        | AmpR, 2 $\mu$ , LEU; pGAL10, NLS-9xMyc-TEV-2xNLS                                                                                                         | This study                  |
| pGEX-6P1                              | AmpR, GST                                                                                                                                                | GE healthcare               |
| pGEX-Def1 <sup>1-500</sup>            | AmpR, GST-Def11-500                                                                                                                                      | This study                  |
| pGEX-Def1 <sup>1-500/CUEm</sup>       | AmpR, GST-Def11-500. CUE mutated at I54A, I55A, F33A, P34A                                                                                               | This study                  |
| pGEX-Dsk2                             | AmpR, GST-Dsk2                                                                                                                                           | (Anindya et al., 2010)      |
| pGST-MD                               | AmpR, GST-6xHis-MultiDsk                                                                                                                                 | (Wilson et al., 2012)       |
| pGEX-Rsp5                             | AmpR, GST-Rsp5                                                                                                                                           | (Somesh et al., 2005)       |
| pET21-Ubc5                            | AmpR, 6xHis-Ubc5                                                                                                                                         | (Parker and Ulrich, 2009)   |
| pST44-Elc1-Ela1                       | AmpR, His-Elc1, Ela1. Poly-cistronic                                                                                                                     | This study                  |
| pST44-Elc1-Ela1 <sup>1-250</sup>      | AmpR, His-Elc1, Ela1 residues 1-250                                                                                                                      | This study                  |
| pST44-Elc1-Ela1 <sup>1-300</sup>      | AmpR, His-Elc1, Ela1 residues 1-300                                                                                                                      | This study                  |
| pST44-Elc1-Ela1 <sup>1-350</sup>      | AmpR, His-Elc1, Ela1 residues 1-350                                                                                                                      | This study                  |
| pGEX-Ubi                              | AmpR, GST-Ubiquitin                                                                                                                                      | (Anindya et al., 2010)      |
| pGEX-Ubi <sup>i44A</sup>              | AmpR, GST-Ubiquitin (I44A mutated)                                                                                                                       | (Anindya et al., 2010)      |
| pGEX-Ela1 <sup>350-379</sup>          | AmpR, GST-Ela1 C-terminus residues 250-379                                                                                                               | This study                  |
| pPS815                                | AmpR, 2 $\mu$ , URA, pADH1, SV40 NLS-GFP-LacZ                                                                                                            | (Lee et al., 1996)          |
| pPS1372                               | AmpR, 2 $\mu$ , URA, pADH1, SV40 NLS-NES-GFP2                                                                                                            | (Taura et al., 1998)        |
| pBOW3 NLS-GFP-def1 <sup>500-738</sup> | AmpR, 2 $\mu$ , HIS, pADH1, SV40 NLS-GFP-DEF1500-738                                                                                                     | This study                  |
| pYES2                                 | AmpR, 2 $\mu$ , URA, pGAL1                                                                                                                               | Invitrogen                  |
| pYES2-DEF1                            | AmpR, 2 $\mu$ , URA, pGAL1, DEF1                                                                                                                         | This study                  |
| pYES2-def1 <sup>1-400</sup>           | AmpR, 2 $\mu$ , URA, pGAL1, DEF11-400                                                                                                                    | This study                  |
| pYES2-def1 <sup>1-500</sup>           | AmpR, 2 $\mu$ , URA, pGAL1, DEF11-500                                                                                                                    | This study                  |
| pYES2-def1 <sup>1-600</sup>           | AmpR, 2 $\mu$ , URA, pGAL1, DEF11-600                                                                                                                    | This study                  |
| pYC2/NT                               | AmpR, CEN, URA, pGAL1                                                                                                                                    | Invitrogen                  |
| pYC2-DEF1                             | AmpR, CEN, URA, pGAL1, DEF1                                                                                                                              | This study                  |
| pYC2-def1 <sup>1-500</sup>            | AmpR, CEN, URA, pGAL1, DEF11-500                                                                                                                         | This study                  |
| pYC2-def1 <sup>CUEm</sup>             | AmpR, CEN, URA, pGAL1, DEF1 CUE mutated (I54A, I55A, F33A, P34A)                                                                                         | This study                  |
| pYC2-def1 <sup>1-500CUEm</sup>        | AmpR, CEN, URA, pGAL1, DEF11-500 CUE mutated (I54A, I55A, F33A, P34A)                                                                                    | This study                  |
| pYC2-NES-DEF1                         | AmpR, CEN, URA, pGAL1, NES-DEF1 (NES=LALKLAGLDI)                                                                                                         | This study                  |
| pYC2-NES-def1 <sup>1-500</sup>        | AmpR, CEN, URA, pGAL1, NES-DEF11-500                                                                                                                     | This study                  |
| pYM28                                 | AmpR, CEN, HIS, eGFP                                                                                                                                     | (Janke et al., 2004)        |

Table S3. Primary Antibodies Used in This Study, Related to Experimental Procedures

| Antibody       | Epitope                 | Source    | Supplier   | Dilution  |
|----------------|-------------------------|-----------|------------|-----------|
| 4H8            | Rpb1 CTD                | Mouse, m  | Abcam      | 1: 10,000 |
| 8WG16          | Rpb1 CTD                | Mouse, m  | Abcam      | 1: 1,000  |
| 9E10           | Myc tag                 | Mouse, m  | Abcam      | 1: 5,000  |
| 9E11           | Myc tag                 | Mouse, m  | Abcam      | 1: 5,000  |
| $\alpha$ -Pgk1 | Pgk1                    | Mouse, m  | Invitrogen | 1: 10,000 |
| $\alpha$ -His  | 6xHis                   | Mouse, m  | Clontech   | 1: 1,000  |
| 12CA5          | HA tag                  | Mouse, m  | Abcam      | 1: 1,000  |
| $\alpha$ -Ela1 | Ela1 <sub>115-214</sub> | Mouse, p  | Abcam      | 1: 1,000  |
| P4D1           | Ubiquitin               | Mouse, m  | Millipore  | 1: 1,000  |
| $\alpha$ -Def1 | Def1 <sub>388-738</sub> | Rabbit, p | This study | 1: 1,000  |

m, monoclonal; p, polyclonal. CTD, C-terminal domain
